# Supplementary material
Source: PubMed Central journal article supplement (PMC4100795)
Supplement: la501595f_si_001.pdf [file la501595f_si_001.pdf]

# **Supporting Information**

## **Potential Toxicity of Up-converting Nanoparticles Encapsulated with a Bilayer Formed by Ligand Attraction**

Gautom K. Das<sup>†</sup>, Daniel Stark<sup>†</sup> and Ian M. Kennedy\*

Department of Mechanical and Aerospace Engineering,

One Shields Avenue, University of California, Davis, CA, 95616.

\*Email: [imkennedy@ucdavis.edu](mailto:imkennedy@ucdavis.edu)

<sup>†</sup> Authors with equal contributions

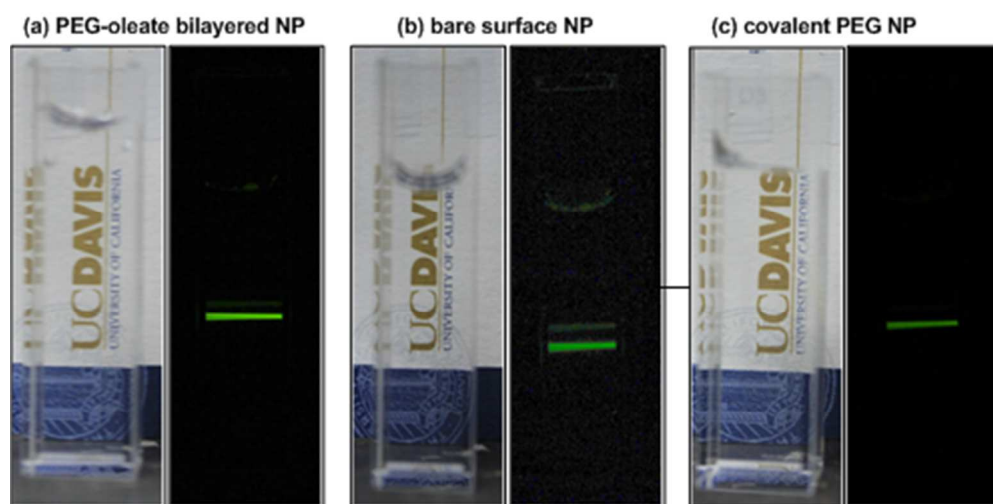

**Figure S1.** Cuvettes of nanoparticle dispersion in water after different surface modifications (left panel). Green line of NPs emission is seen upon 980 nm excitation (right panel in each case). NPs concentrations in all cuvettes were 1 mg/ml with a laser power 65 W/cm<sup>2</sup>.

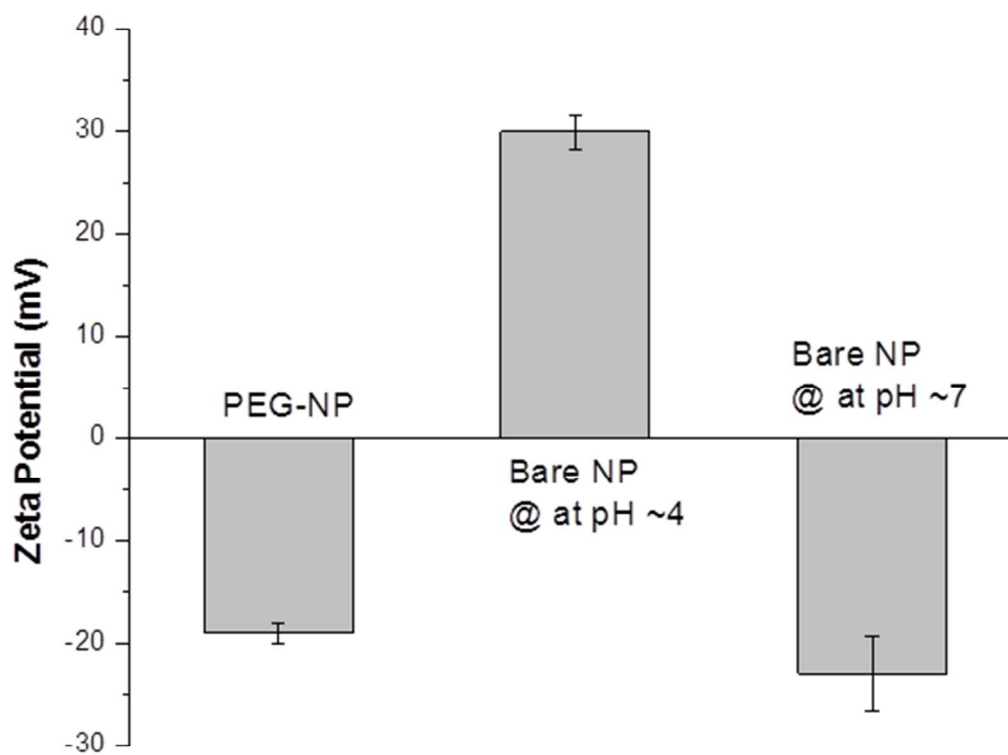

**Figure S2.** Zeta-potential of the PEG-oleate bilayered NPs and ligand free NPs at reaction condition (pH ~4) and condition at cell study (pH ~7).

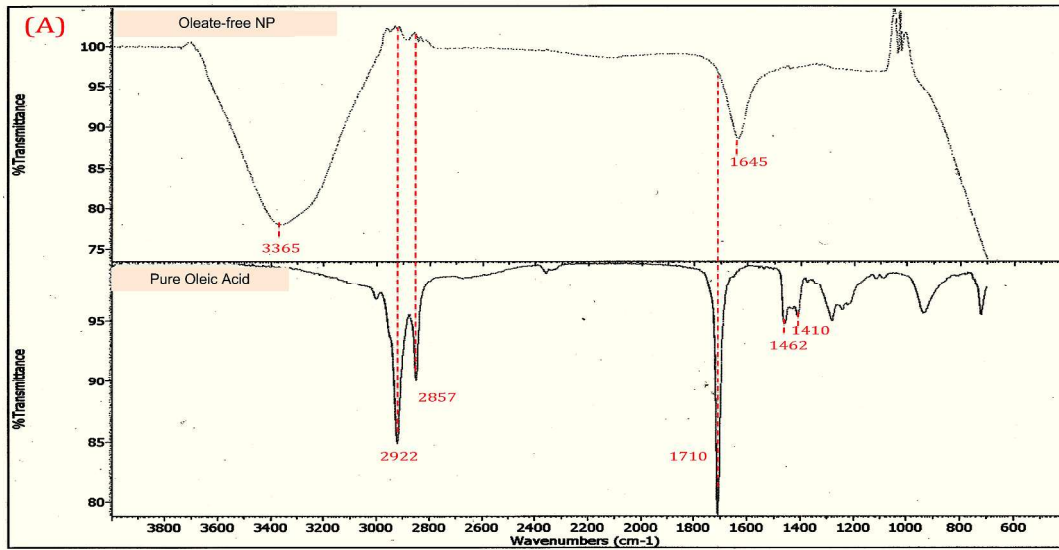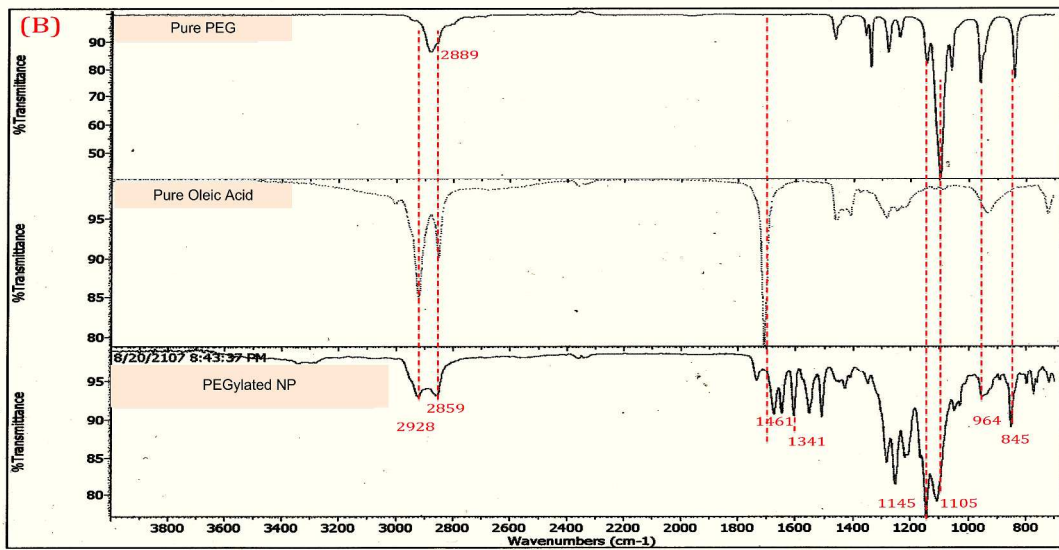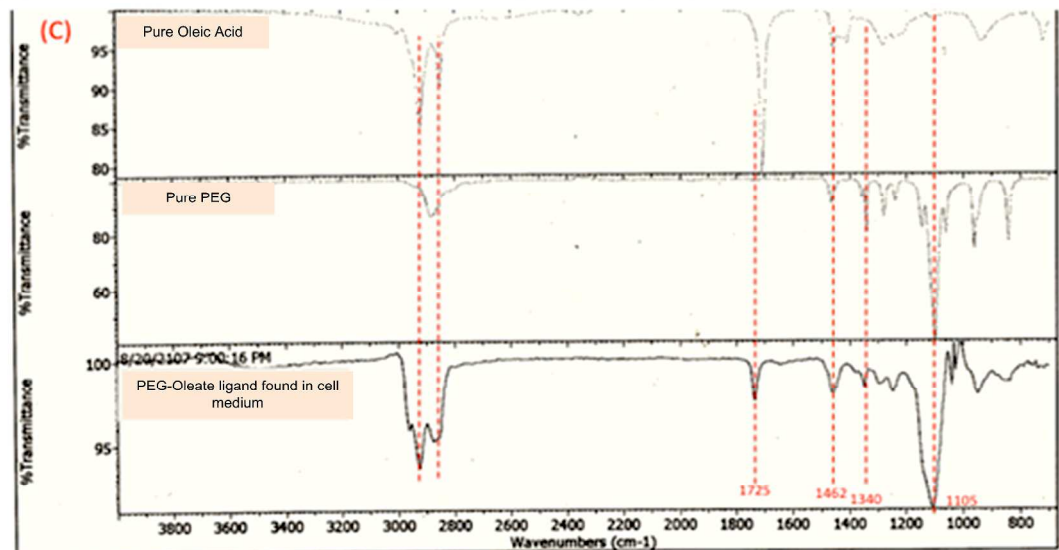

**Figure S3.** Fourier transformation infrared (FTIR) spectra of: (A) bare surface NaYF<sub>4</sub>:Yb,Er (i.e. ligand free) NPs and comparison with pure oleic acid, (B) typical PEGylated NaYF<sub>4</sub>:Yb,Er NPs (i.e. both PEG-oleate bilayered and covalently bound PEG-NPs showed similar spectra) and comparison with pure oleic acid and pure PEG, and (C) the PEG-oleate ligand molecules found in cell media.

To characterize the surface-treated nanoparticles, FTIR spectra were collected. Figure S3 represents the spectra of oleic acid, PEG, PEG-oleate intercalated NPs and PEG-monooleate molecules found in the cell culture medium. The assignments of peaks are listed in the Table S1. Fig. S3(A) shows the comparison of pure oleic acid and oleate-stripped bare particles (i.e. ligand free) particle. As shown in the figure the characteristic peaks of oleic acid at 2922, 2857 and 1710 cm<sup>-1</sup> due to asymmetric, symmetric CH<sub>2</sub> stretch, and C=O stretch respectively are absent in the oleate free NPs (i.e. bare particle). Two peaks appeared at 3365 cm<sup>-1</sup> and 1645 cm<sup>-1</sup> are originated from O-H stretching vibration and bend vibration of surface hydroxyl groups of the stripped particles. Fig. S3 (B) shows the spectra of the PEG-oleate intercalated particles where the CH<sub>2</sub> stretching bands of oleic acid is little broad due to CH<sub>2</sub> stretching band of PEG at 2889 cm<sup>-1</sup>. The band at 1710 cm<sup>-1</sup> is suppressed due to other bands of PEG at 1461 cm<sup>-1</sup> and around. The intense peak for C-O stretching of PEG shows up at 1105- 11045 cm<sup>-1</sup> in the intercalated NPs. However, when we found and separated PEG-mono-oleate molecules in the cell culture media, they show neat peaks of PEG and oleic acids as shown in Fig. S3 (C).

**Table S1.** Assignments of FTIR peaks of the sample

|            | Wavenumber<br>(cm <sup>-1</sup> ) | Assignments                           | Reference      |
|------------|-----------------------------------|---------------------------------------|----------------|
| Oleic acid | 2922                              | asymmetric CH <sub>2</sub> stretch    | Wu et al.[S1]  |
|            | 2857                              | symmetric CH <sub>2</sub> stretch     |                |
|            | 1710                              | C=O stretch                           |                |
|            | 1462                              | In plane O-H band                     |                |
|            | 1410                              | CH <sub>3</sub> umbrella mode         |                |
| PEG        | 2889                              | CH <sub>2</sub> stretch               | Lin et al.[S2] |
|            | 1461                              | CH <sub>2</sub> bending               |                |
|            | 1341                              | OH bending, CH <sub>2</sub> formation |                |
|            | 1105                              | C-O stretching                        |                |
|            | 964                               | CH <sub>2</sub> bending               |                |
|            | 845                               | C-C stretching                        |                |

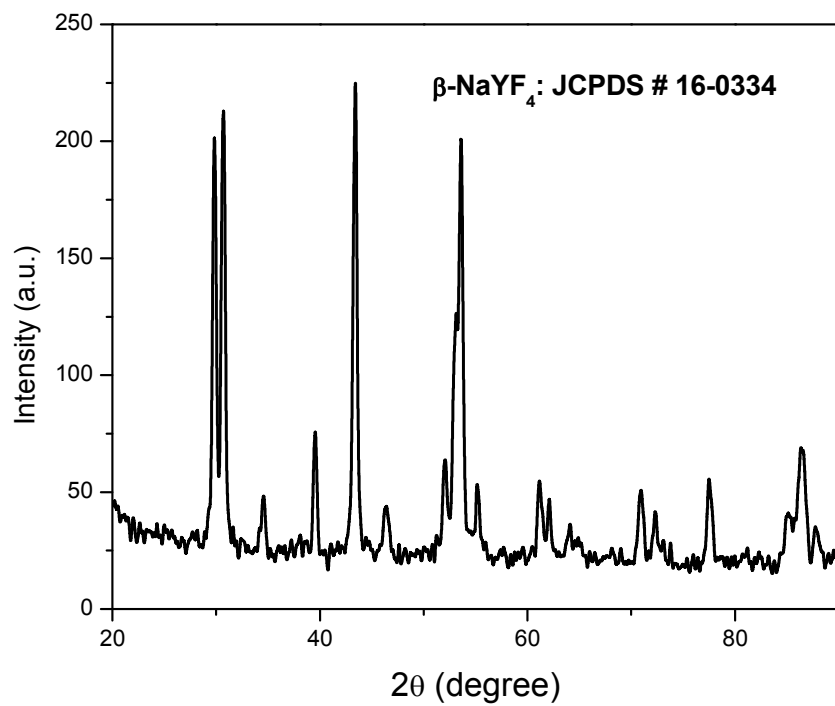

**Figure S4.** XRD pattern of the synthesized NaYF<sub>4</sub>:Yb,Er

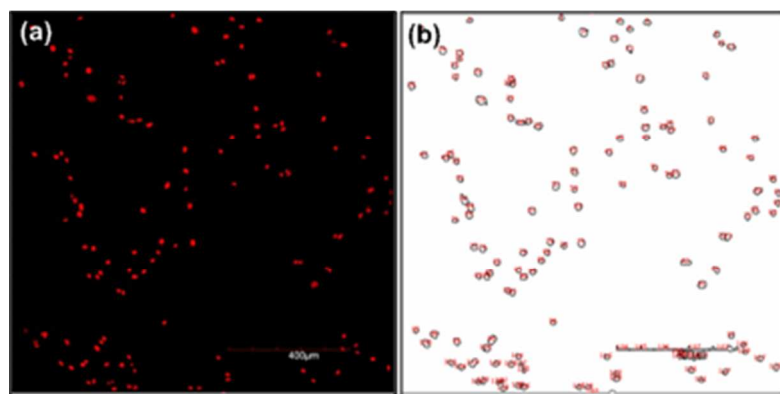

**Figure S5.** Propidium iodide (PI) stained control cells and corresponding image J analysis.

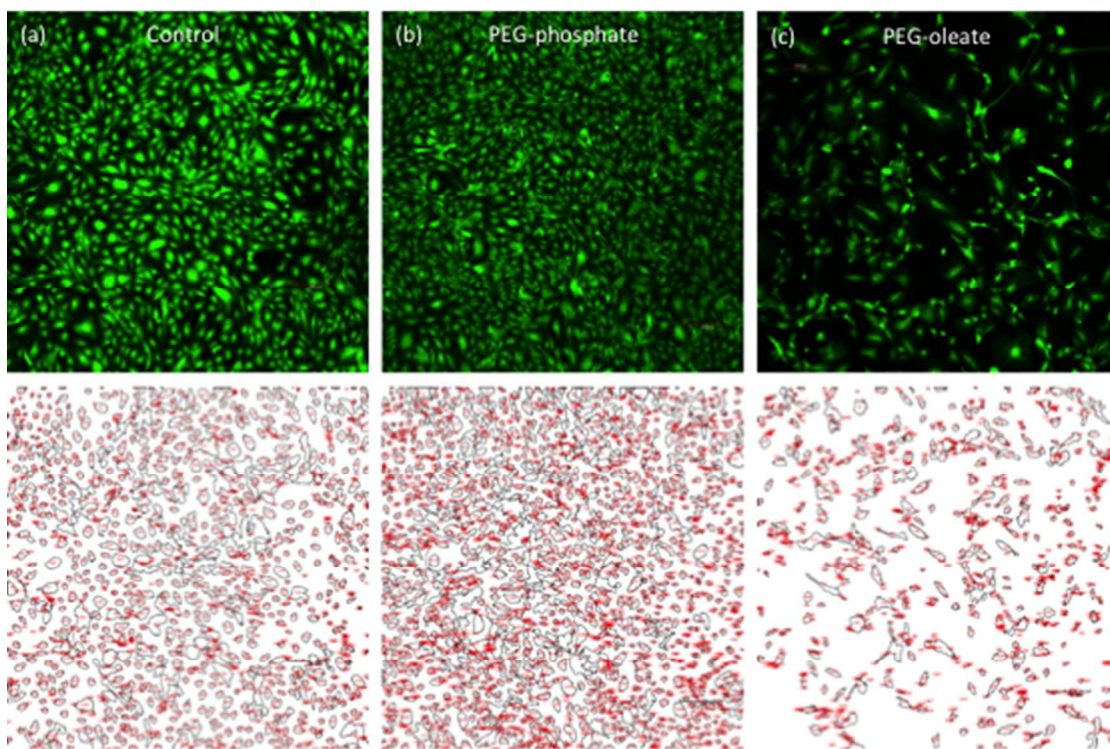

**Figure S6.** Fluorescent image of cells from calcein assays (top panel), and quantification analysis of the confocal fluorescent images using Image J analysis (bottom). All cells were incubated with 75  $\mu\text{g/ml}$  NPs for 24 h. Surface area counts were normalized by calcein control. Analysis shows that the HAEC control has 1426 cells (28.6% of area) while covalently bound PEG-NPs have 2312 cells (32.2% of area) compared to PEG-oleate bilayered NPs which have 1235 cells (11.0% area)

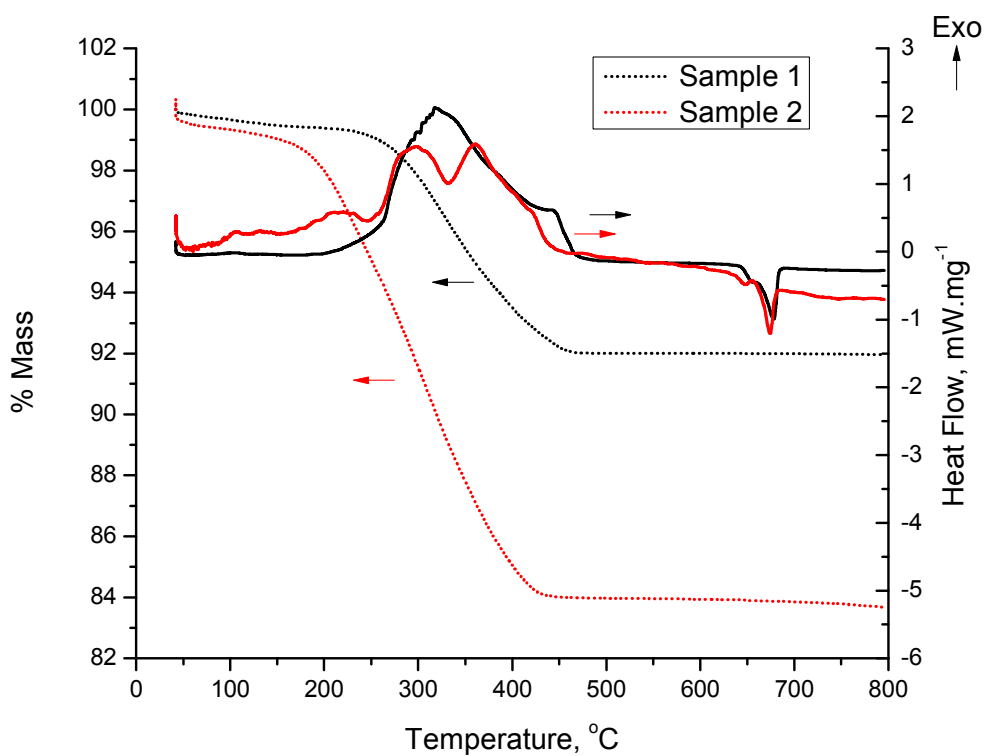

**Figure S7.** Thermogravimetric analysis (TGA) of oleate capped NaYF<sub>4</sub>:Yb,Er and PEG-oleate bilayered NaYF<sub>4</sub>:Yb,Er NPs. (Sample 1 being oleate-capped NaYF<sub>4</sub>:Yb,Er, and sample 2 being PEG-oleate bilayered NaYF<sub>4</sub>:Yb,Er NPs)



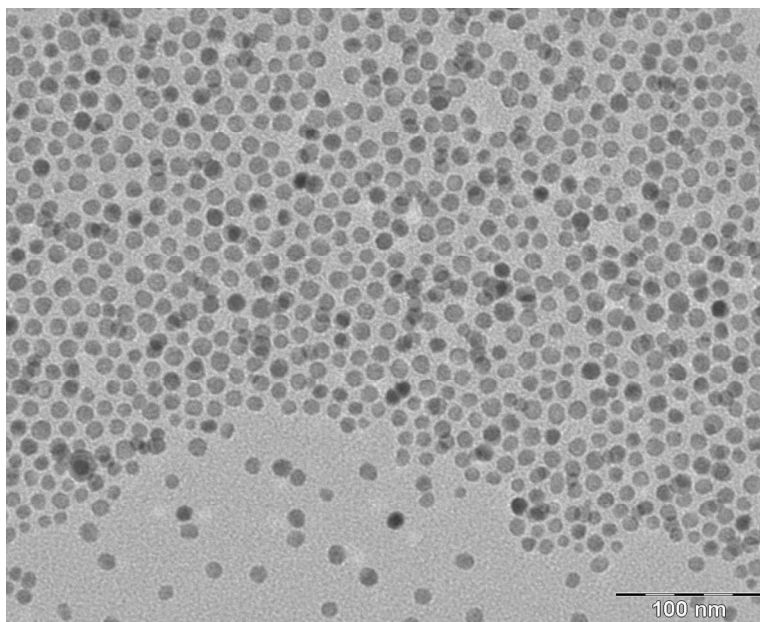

**Figure S8.** TEM micrograph of NaGdF<sub>4</sub>:Yb,Er used in the study. Average particle size was measured to be ~13 nm.

## REFERENCES

- [S1] Wu N, Fu L, Su M, Aslam M, Wong KC, Dravid VP. Interaction of Fatty Acid Monolayers with Cobalt Nanoparticles. *Nano Letters*. 2004;4:383-6.
- [S2] Lin Z, Han X, Wang T, Li S. Effects of adding nano metal powders on thermooxidative degradation of poly(ethylene glycol). *J Therm Anal Calorim*. 2008;91:709-14.
- [S3] Changfu X, Mo M, Liwen Y, Songjun Z, Qibin Y. Upconversion luminescence and magnetic properties of ligand-free monodisperse lanthanide doped BaGdF<sub>5</sub> nanocrystals. *J Lumin*. 2011; 131; 2544 – 49.
